# Supplementary material for: A Personalized, Interactive, Cognitive Behavioral Therapy–Based Digital Therapeutic (MODIA) for Adjunctive Treatment of Opioid Use Disorder: Development Study
Source: PubMed Central journal article supplement (PMC8538017; doi:10.2196/31173), 2021-10-08
Supplement: mental_v8i10e31173_app1.pdf [file mental_v8i10e31173_app1.pdf]

**Supplementary Table. Content outline of the 24 MODIA “chats”**

| <b>Topic (chat title)</b>                                        | <b>Main goal of chat</b>                                                                                                                            | <b>Content outline<sup>a</sup></b>                                                                                                                                                                                                                                                                                                                                                                                                                                                                                         |
|------------------------------------------------------------------|-----------------------------------------------------------------------------------------------------------------------------------------------------|----------------------------------------------------------------------------------------------------------------------------------------------------------------------------------------------------------------------------------------------------------------------------------------------------------------------------------------------------------------------------------------------------------------------------------------------------------------------------------------------------------------------------|
| <b>Cluster 1: “Basic techniques and principles”</b>              |                                                                                                                                                     |                                                                                                                                                                                                                                                                                                                                                                                                                                                                                                                            |
| 1. Introduction to MODIA (“Meet and greet”)                      | Orient and engage patients; provide basic education and motivation to continue using MODIA.                                                         | <ul style="list-style-type: none"> <li>• Introduction to the program’s function and purpose</li> <li>• Facilitating hope and positive expectancies</li> <li>• Interactive exploration of patient’s background</li> <li>• Risk and safety information</li> <li>• Recommendations for optimal program use</li> </ul>                                                                                                                                                                                                         |
| 2. Enhancing motivation (“Taking the measurements”)              | Build motivation by encouraging patients to reflect on the advantages of abstaining and the disadvantages of continuing to use opioids.             | <ul style="list-style-type: none"> <li>• Interactive exploration of current motivation to stop using opioids</li> <li>• Exploration of motivational stages of change</li> <li>• Enhancing motivation by building awareness of personal reasons for and ability to change</li> </ul>                                                                                                                                                                                                                                        |
| 3. Functional analysis (“The bird’s eye view”)                   | Empower patients to gain greater clarity on trigger situations and teach simple techniques to improve their ability to resist urges to use opioids. | <ul style="list-style-type: none"> <li>• Build awareness of personal high-risk situations and triggers</li> <li>• Introduction to functional analysis</li> <li>• Simple techniques to cope with triggers</li> <li>• Audio mental imagery/mindfulness meditation exercise to build skills to resist triggers and cravings</li> </ul>                                                                                                                                                                                        |
| 4. Behavioral coping with triggers (“Look over there!”)          | Empower patients by teaching them how to identify and avoid high-risk situations and use simple behavioral techniques to cope with such situations. | <ul style="list-style-type: none"> <li>• Interactive functional analysis and structured assessment of: <ul style="list-style-type: none"> <li>○ Personal trigger situations</li> <li>○ Automatically elicited thoughts and feelings</li> <li>○ Typical behaviors in high-risk situations</li> <li>○ Short-term consequences</li> <li>○ Negative long-term consequences</li> </ul> </li> <li>• Interactive exploration of potential approaches to altering contingencies; using behaviors for distraction coping</li> </ul> |
| 5. Cognitive coping with triggers (“The stranger in the mirror”) | Empower patients by teaching them simple methods targeting cognitions that increase risk for opioid use.                                            | <ul style="list-style-type: none"> <li>• Use of mental strategies rather than physical distraction activities to cope with triggers or urges to use</li> <li>• Audio exercise: revisiting the “healthy future self”</li> <li>• Fictional case example to illustrate successful and unsuccessful coping</li> <li>• Interactive exploration of cognitive coping techniques</li> <li>• Recognizing common cognitive distortions</li> </ul>                                                                                    |
| 6. Review of first cluster (“Let’s get physical”)                | Review previously learned CBT techniques and educate patients on role of healthy lifestyle in recovery.                                             | <ul style="list-style-type: none"> <li>• Review of key techniques from previous five “chats”</li> <li>• Integrating the CBT techniques to build a healthy lifestyle</li> <li>• Interactive exploration of the role of nutrition in opioid dependence</li> <li>• Interactive exploration of sleep habits and review of principle of sleep hygiene</li> </ul>                                                                                                                                                                |

|                                                                   |                                                                                                                                                                    |                                                                                                                                                                                                                                                                                                                                                                                                                                                                                                                                                                                       |
|-------------------------------------------------------------------|--------------------------------------------------------------------------------------------------------------------------------------------------------------------|---------------------------------------------------------------------------------------------------------------------------------------------------------------------------------------------------------------------------------------------------------------------------------------------------------------------------------------------------------------------------------------------------------------------------------------------------------------------------------------------------------------------------------------------------------------------------------------|
|                                                                   |                                                                                                                                                                    | <ul style="list-style-type: none"> <li>• Audio exercise: mental imagery to review key techniques form Cluster 1</li> </ul>                                                                                                                                                                                                                                                                                                                                                                                                                                                            |
| <b>Cluster 2: “Learning psychological flexibility skills”</b>     |                                                                                                                                                                    |                                                                                                                                                                                                                                                                                                                                                                                                                                                                                                                                                                                       |
| 7. Defusion and emotional distancing (“The defusion solution”)    | Teach patients to learn “defusion” techniques to distance themselves from unhelpful thoughts and feelings.                                                         | <ul style="list-style-type: none"> <li>• Introduction to the core topic of Cluster 2: “psychological flexibility” (PF)</li> <li>• Overview and interactive exploration of the six components of PF (e.g., defusion, acceptance, presence, self-discovery, values, committed action)</li> </ul>                                                                                                                                                                                                                                                                                        |
| 8. Acceptance and distress tolerance (“The acceptance conundrum”) | Teach patients acceptance skills to improve distress tolerance while remaining committed to recovery-related goals.                                                | <ul style="list-style-type: none"> <li>• Introduction to acceptance as a key PF technique</li> <li>• Interactive exploration of aversive thoughts and feelings</li> <li>• Experiential exercise to illustrate difficulties with thought suppression</li> <li>• Therapeutic metaphors to convey the principle of acceptance</li> <li>• Introduction of the ACT concept and skill of “willingness”</li> <li>• Mental imagery story-based exercise to experience and practice willingness</li> </ul>                                                                                     |
| 9. Mindfulness and presence (“Enter the Buddha”)                  | Teach patients mindfulness techniques to reduce stress and improve coping with cravings, urges to use, and other aversive mental and emotional experiences.        | <ul style="list-style-type: none"> <li>• Brief step-by-step guided experiential mindfulness exercise</li> <li>• Mindfulness meditation exercises</li> <li>• Guided mindfulness exercise</li> <li>• Fictional case examples to convey the personal relevance of mindfulness meditation</li> </ul>                                                                                                                                                                                                                                                                                      |
| 10. Self-discovery (“Who am I?”)                                  | Teach patients self-discovery skills to help them cope with high-risk situations and improve their general ability to remain committed towards healthy life goals. | <ul style="list-style-type: none"> <li>• Introduction to the three facets of self-discovery: the “conceptual self,” contacting the “stream of consciousness,” and “the observing self”</li> <li>• Invitation to engage in expressive writing exercise</li> <li>• Fictional case example to illustrate expressive writing; exercises to discover and observe the stream of consciousness</li> <li>• Experiential exercise on the “observing self”</li> </ul>                                                                                                                           |
| 11. Values clarification (“The best values”)                      | Teach patients to clarify valued life directions to orient them toward a healthy life “beyond opioid dependence” and thereby support their recovery goals.         | <ul style="list-style-type: none"> <li>• Mental imagery exercise (“revisiting your healthy future self”)</li> <li>• Interactive introduction to personal values clarification as a key component of psychological flexibility</li> <li>• Fictional case example to illustrate the relevance of personal values</li> <li>• Exploration of values can be identified</li> <li>• Interactive review of importance and time investment with regard to common core values</li> <li>• Interactive exploration of relevance of personal values in the context of opioid dependence</li> </ul> |
| 12. Commitment to healthy actions (“Do it!”)                      | Teach patients “behavioral commitment” techniques to support their efforts to achieve healthy recovery goals.                                                      | <ul style="list-style-type: none"> <li>• Introduction to the “committed action” PF facet</li> <li>• Review of potential obstacles that might prevent patient from pursuing core values</li> <li>• Fictional story to illustrate the concept of “SMART” goals (specific, measurable, adaptive, realistic, time-framed)</li> </ul>                                                                                                                                                                                                                                                      |

|                                                                                       |                                                                                                                                                  |                                                                                                                                                                                                                                                                                                                                                                                                                                                                                                                                                                                                                                                                                                                                                                                                                                                                   |
|---------------------------------------------------------------------------------------|--------------------------------------------------------------------------------------------------------------------------------------------------|-------------------------------------------------------------------------------------------------------------------------------------------------------------------------------------------------------------------------------------------------------------------------------------------------------------------------------------------------------------------------------------------------------------------------------------------------------------------------------------------------------------------------------------------------------------------------------------------------------------------------------------------------------------------------------------------------------------------------------------------------------------------------------------------------------------------------------------------------------------------|
|                                                                                       |                                                                                                                                                  | <ul style="list-style-type: none"> <li>• Exploration of simple strategies to increase commitment to value-consistent actions</li> <li>• Mindfulness-based audio recording on committed action</li> </ul>                                                                                                                                                                                                                                                                                                                                                                                                                                                                                                                                                                                                                                                          |
| <b>Cluster 3: “Applying therapeutic skills to important life domains”<sup>b</sup></b> |                                                                                                                                                  |                                                                                                                                                                                                                                                                                                                                                                                                                                                                                                                                                                                                                                                                                                                                                                                                                                                                   |
| 13. Interpersonal relationships (“Circles of friends”)                                | Empower patients by improving their ability to cultivate harmonious relationships that support their recovery goals and reduce risk for relapse. | <ul style="list-style-type: none"> <li>• Interactive exploration of the relevance of interpersonal relationship to opioid dependence</li> <li>• Identification of problematic relationships and perceived reasons for problems</li> <li>• Simulated role-plays to apply acceptance and willingness skills to relationships and to practice resisting social triggers</li> <li>• Interactive exploration of relationships that might contribute to opioid use</li> <li>• Interactive review of assertive communication techniques</li> <li>• Mental imagery exercise on helpful and unhelpful relationships</li> </ul>                                                                                                                                                                                                                                             |
| 14. Depression (“The deepest shade of blue”)                                          | Empower patients by teaching and rehearsing skills to reduce dysphoria and depression, which can interfere with the recovery process.            | <ul style="list-style-type: none"> <li>• Explanation of how opioid dependence increases depression risk, CBT principles, and how CBT can help reduce depression</li> <li>• Interactive review of current depression symptoms</li> <li>• Recommendation to contact healthcare professional or suicide prevention lifeline if needed</li> <li>• Explanation and discussion of key behavioral activation principles</li> <li>• Activity ideas for different valued life domains</li> <li>• Clarification of commitment and opportunity to declare high or low motivation</li> <li>• Identifying and overcoming typical cognitive-affective obstacles in behavioral activation</li> <li>• Applying acceptance- and defusion-based techniques to cope with unhelpful cognitions</li> <li>• Applying psychological flexibility skills to overcome depression</li> </ul> |
| 15. Anxiety and persistent worries (“Chewing your nails”)                             | Empower patients by teaching and rehearsing CBT skills for successful anxiety management, which also supports their recovery goals.              | <ul style="list-style-type: none"> <li>• Interactive exploration on anxiety and relevance to opioid dependence</li> <li>• Exploration of personally relevant worries, fears, and anxieties</li> <li>• Experiential exercise: conjuring up anxious thoughts/feelings and applying psychological flexibility techniques to them</li> <li>• Interactive review of key CBT strategies for coping with anxiety</li> <li>• Applying defusion techniques to anxiety</li> <li>• Alternative mental imagery for defusion of anxious thoughts and feelings</li> <li>• Mental imagery exercise on the “healthy future” self who illustrates applying willingness/acceptance techniques to coping with anxiety</li> </ul>                                                                                                                                                     |
| 16. Anger management (“Seeing red”)                                                   | Empower patients by teaching and rehearsing effective therapeutic                                                                                | <ul style="list-style-type: none"> <li>• Interactive exploration of the personal relevance of anger, frustration, and irritability</li> </ul>                                                                                                                                                                                                                                                                                                                                                                                                                                                                                                                                                                                                                                                                                                                     |

|                                                                                                          |                                                                                                                                                                   |                                                                                                                                                                                                                                                                                                                                                                                                                                                                                                                                                                                                                                                                                                                                                        |
|----------------------------------------------------------------------------------------------------------|-------------------------------------------------------------------------------------------------------------------------------------------------------------------|--------------------------------------------------------------------------------------------------------------------------------------------------------------------------------------------------------------------------------------------------------------------------------------------------------------------------------------------------------------------------------------------------------------------------------------------------------------------------------------------------------------------------------------------------------------------------------------------------------------------------------------------------------------------------------------------------------------------------------------------------------|
|                                                                                                          | techniques to manage anger and irritability, which could interfere with recovery progress.                                                                        | <ul style="list-style-type: none"> <li>• Fictional case example to illustrate how anger is elicited from a CBT perspective</li> <li>• Identifying factors that facilitate anger</li> <li>• Using psychological flexibility techniques to manage anger</li> <li>• Review of a mnemonic to manage anger</li> <li>• Using forgiveness and empathy in anger management</li> </ul>                                                                                                                                                                                                                                                                                                                                                                          |
| 17. Sleep problems and insomnia (“Perchance to dream”)                                                   | Empower patients by teaching and rehearsing effective CBT skills for overcoming insomnia and improving the quality of sleep.                                      | <ul style="list-style-type: none"> <li>• Discussion of insomnia in the context of opioid dependence</li> <li>• Brief questionnaire on potential sleep problems</li> <li>• CBT strategies for better sleep</li> <li>• “Sleep meditation” to facilitate falling asleep</li> <li>• Interactive guided discovery of CBT sleep principles</li> <li>• Discussion of other treatment options for insomnia (e.g., medication)</li> </ul>                                                                                                                                                                                                                                                                                                                       |
| 18. Problem-solving skills (“Checkmate”)                                                                 | Empower patients by teaching them general and broadly applicable techniques for problem-solving across a range of life domains.                                   | <ul style="list-style-type: none"> <li>• Introduction to problem-solving as a universal CBT technique</li> <li>• Discussion of systematic sequence in problem-solving: problem definition, setting realistic and attainable goals, identifying potential obstacles and strategies for overcoming them</li> <li>• Discussion and review of final problem-solving steps: rank-ordering plans, putting best plan into action</li> <li>• Audio recording exercise: mindful appreciation of past problem-solving successes and overall progress</li> <li>• Brief review of the “STOP method” and application to problem-solving</li> <li>• Simulated role-play to apply the “STOP method” in a high-risk situation that could lead to opioid use</li> </ul> |
| <b>Cluster 4: “Facilitating personal growth and development: solidifying your healthy self-identity”</b> |                                                                                                                                                                   |                                                                                                                                                                                                                                                                                                                                                                                                                                                                                                                                                                                                                                                                                                                                                        |
| 19. Compassion and self-compassion (“Because I care”)                                                    | Empower patients by teaching them effective compassion and self-compassion skills to help with successful coping with high-risk situations and recovery setbacks. | <ul style="list-style-type: none"> <li>• Overview of positive psychology and personal growth</li> <li>• Introduction to compassion</li> <li>• Guided discovery of the personal relevance of compassion</li> <li>• Interactive discussion on rationale for compassion training</li> <li>• Mental imagery experiential exercise on “feeling compassion toward others and yourself”</li> <li>• Guided discovery exercise on compassion</li> </ul>                                                                                                                                                                                                                                                                                                         |
| 20. Self-esteem and confidence (“Hey, good lookin’”)                                                     | Improve patients’ sense of self-esteem and self-confidence to further support their ability to achieve their recovery goals.                                      | <ul style="list-style-type: none"> <li>• Guided discovery of the personal relevance of self-esteem and self-confidence</li> <li>• Discussion of research on self-esteem/confidence in the context of opioid dependence</li> <li>• CBT definition of self-esteem</li> <li>• Differentiating self-esteem from self-confidence</li> <li>• Guided discovery of low self-esteem/confidence</li> </ul>                                                                                                                                                                                                                                                                                                                                                       |

|                                                                      |                                                                                                                                                                                        |                                                                                                                                                                                                                                                                                                                                                                                                                                                                                                                                                                                                                                           |
|----------------------------------------------------------------------|----------------------------------------------------------------------------------------------------------------------------------------------------------------------------------------|-------------------------------------------------------------------------------------------------------------------------------------------------------------------------------------------------------------------------------------------------------------------------------------------------------------------------------------------------------------------------------------------------------------------------------------------------------------------------------------------------------------------------------------------------------------------------------------------------------------------------------------------|
|                                                                      |                                                                                                                                                                                        | <ul style="list-style-type: none"> <li>• How psychological flexibility techniques can be applied to low self-esteem/confidence; guided discovery and simulated role-play of other defusion techniques</li> <li>• Guided discovery on the detrimental effect of upward social comparison on self-esteem</li> <li>• Mental imagery exercise (“how the healthy future self does not buy into self-disparaging thoughts”)</li> </ul>                                                                                                                                                                                                          |
| 21. Discovering personal strengths (“Look at those assets”)          | Empower patients by focusing their attention on personal strengths and resources, which could help them structure their lives in a healthy manner “beyond opioid dependence.”          | <ul style="list-style-type: none"> <li>• Introduction to discovering personal strengths rather than dwelling on problems/pathology</li> <li>• Mental imagery exercise (“reflections of your strengths in the waterfall”)</li> <li>• Storytelling mental imagery exercise based on the Values in Action (VIA) classification of strengths and virtues</li> <li>• Guided discovery of potential personality strengths across six domains (wisdom, courage, humanity, justice, temperance, transcendence)</li> <li>• Mental imagery exercise: revisiting “people, places, and things” with greater awareness of personal strength</li> </ul> |
| 22. Cultivating the healthy future self (“Your healthy future self”) | Empower patients by strengthening their sense of conviction (or self-efficacy) that they can reach their recovery goals and cope successfully with obstacles they might encounter.     | <ul style="list-style-type: none"> <li>• Praise and reinforcement of progress; guided discovery: “revisiting decisional balance”</li> <li>• Revisiting the mental image of the “healthy future self”</li> <li>• Guided mental imagery exercise: “reflecting on your progress, obstacles and setbacks, and the healthy future self”)</li> <li>• Therapeutic writing exercise</li> <li>• Assessing confidence for reaching healthy future self</li> <li>• Anticipating obstacles and setback</li> <li>• Mental rehearsal of potential coping strategies</li> </ul>                                                                          |
| 23. Anticipating relapses (“Relapse”)                                | Empower patients by teaching them to identify early signs of relapse and respond effectively.                                                                                          | <ul style="list-style-type: none"> <li>• Introduction to preventing and responding to relapse</li> <li>• Interactive review of different stages of relapse: emotional, mental, and physical</li> <li>• Guided discovery: detecting and responding constructively to signs of emotional, mental and physical relapse</li> <li>• Fictional case example of a person who has relapsed and coped</li> <li>• Audio recording mental imagery exercise: “Urge-surfing in the presence of your healthy future self”</li> </ul>                                                                                                                    |
| 24. Grand review and wrap-up (“Blast off to the future! Thank you!”) | Empower patients by providing an effective review of key techniques encountered throughout the program; providing a sense of closure that supports patients’ confidence and ability to | <ul style="list-style-type: none"> <li>• Introducing the “memory palace” technique to rehearse key techniques from previous modules</li> <li>• Guided mental imagery: “a visit to the memory palace with a goodbye-party”</li> <li>• Final praise for having finished the program</li> </ul>                                                                                                                                                                                                                                                                                                                                              |

|  |                                                               |                     |
|--|---------------------------------------------------------------|---------------------|
|  | continue successfully on their journey to sustained recovery. | • Empathic farewell |
|--|---------------------------------------------------------------|---------------------|

<sup>a</sup>Most clusters also include a brief review of the patients' emotional state, a review quiz, and homework assignment

<sup>b</sup>The sequence of modules in Cluster 3 is not fixed; patients are encouraged to apply CBT skills to relevant problem areas; automated suggestion to start with one particular domain (patients can opt to accept the suggestions or select another domain).

*CBT* cognitive-behavioral therapy, *PF* psychological flexibility, *ACT* acceptance and commitment therapy
